# Supplementary material for: Deformation and orientation dynamics of polysiloxane microcapsules in linear shear flow
Source: Royal Society of Chemistry journal article supplement (doi:10.1039/c2sm07182g), 2012-01-01
Supplement: c2sm07182g.pdf [file c2sm07182g.pdf]

Dynamic light scattering measurement of OTS-solution with “low water” concentration at  $\Gamma=12$  molecules/nm<sup>2</sup>. In these solutions we measured a relatively broad distribution of particles with diameters between 100 and 300 nm.

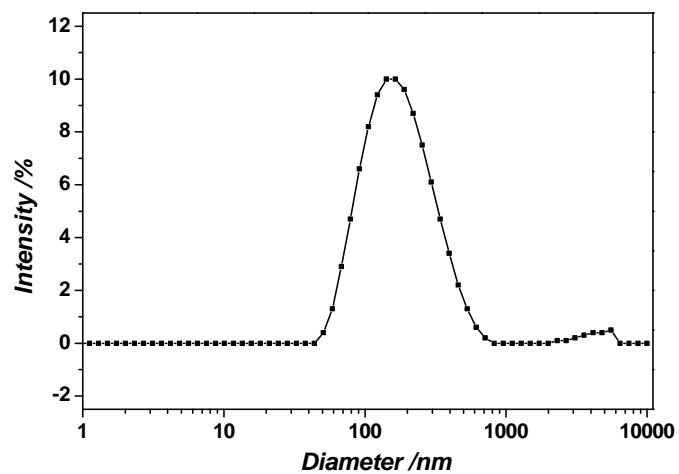

Fig. 1. Particle Size Distribution in „low water“ solvent.
